# Supplementary material
Source: PubMed Central journal article supplement (PMC9764989)
Supplement: aac.00935-22-s0001.pdf [file aac.00935-22-s0001.pdf]

**Appendix A.** Summary of Alanine Aminotransferase and Aspartate Aminotransferase Elevations by Sex, Race, and Treatment Cohort

| <b>Cohort</b> | <b>Sex</b> | <b>Asian<br/>n/N (%)</b> | <b>Black or African American<br/>n/N (%)</b> | <b>White<br/>n/N (%)</b> | <b>Multiracial<br/>n/N (%)</b> |
|---------------|------------|--------------------------|----------------------------------------------|--------------------------|--------------------------------|
| All Subjects  | Male       | 3/3 (100)                | 7/17 (41)                                    | 2/4 (50)                 | -                              |
|               | Female     | 2/4 (50)                 | 3/12 (25)                                    | 2/6 (33)                 | 0/2 (0)                        |
| Cohort 1      | Male       | -                        | 0/2 (0)                                      | 1/2 (50)                 | -                              |
|               | Female     | -                        | 0/4 (0)                                      | -                        | -                              |
| Cohort 2      | Male       | -                        | 1/5 (20)                                     | 0/1 (0)                  | -                              |
|               | Female     | -                        | -                                            | 0/1 (0)                  | 0/1 (0)                        |
| Cohort 3      | Male       | -                        | 1/2 (50)                                     | 1/1 (100)                | -                              |
|               | Female     | 2/3 (67)                 | 1/1 (100)                                    | 0/1 (0)                  | -                              |
| Cohort 4      | Male       | -                        | 2/3 (67)                                     | -                        | -                              |
|               | Female     | -                        | 0/4 (0)                                      | 1/1 (100)                | -                              |
| Cohort 5      | Male       | 1/1 (100)                | 2/3 (67)                                     | -                        | -                              |
|               | Female     | 0/1 (0)                  | 1/1 (100)                                    | 0/1 (0)                  | 0/1 (0)                        |
| Cohort 6      | Male       | 2/2 (100)                | 1/2 (50)                                     | -                        | -                              |
|               | Female     | -                        | 1/2 (50)                                     | 1/2 (50)                 | -                              |

**Appendix B. Toxicity Grading Tables**

**Clinical Adverse Events**

| <b>CARDIOVASCULAR TOXICITY</b>                                                | <b>Mild<br/>(Grade 1)</b>                                                                 | <b>Moderate<br/>(Grade 2)</b>                                                                          | <b>Severe<br/>(Grade 3)</b>                                                                                  |
|-------------------------------------------------------------------------------|-------------------------------------------------------------------------------------------|--------------------------------------------------------------------------------------------------------|--------------------------------------------------------------------------------------------------------------|
| Arrhythmia                                                                    |                                                                                           | Asymptomatic; transient signs; no medical intervention required                                        | Recurrent/persistent; symptomatic medical intervention required                                              |
| Hemorrhage, Blood Loss                                                        | Estimated blood loss <100 mL                                                              | Estimated blood loss ≥100 mL, no transfusion required                                                  | Transfusion required                                                                                         |
| QTc (Fridericia's correction) <sup>1</sup><br>or QTcb (Bazett's) <sup>1</sup> | Asymptomatic, QTc interval 450-479 msec OR Increase in interval 20-30 msec above baseline | Asymptomatic, QTc interval 480-499 msec OR Increase in interval 31-50 msec above baseline              | Asymptomatic, QTc interval ≥ 500 msec OR Increase in interval ≥ 51 msec above baseline                       |
| PR Interval (prolonged) <sup>1</sup>                                          | PR interval 0.21-0.25 sec                                                                 | PR interval >0.25                                                                                      | Type II 2 <sup>nd</sup> degree AV block OR Ventricular pause >3.0 sec                                        |
| <b>RESPIRATORY TOXICITY</b>                                                   | <b>Mild<br/>(Grade 1)</b>                                                                 | <b>Moderate<br/>(Grade 2)</b>                                                                          | <b>Severe<br/>(Grade 3)</b>                                                                                  |
| Cough                                                                         | Transient; no treatment                                                                   | Persistent cough                                                                                       | Interferes with daily activities                                                                             |
| Bronchospasm, Acute                                                           | Transient; no treatment; 71% - 80% FEV1 of predicted peak flow                            | Requires medical intervention; normalizes with bronchodilator; FEV1 60% - 70% (of predicted peak flow) | No normalization with bronchodilator; FEV1 < 60% of predicted peak flow                                      |
| Dyspnea                                                                       | Does not interfere with usual and social activities                                       | Interferes with usual and social activities; no treatment                                              | Prevents daily and usual social activity OR requires treatment                                               |
| <b>GASTROINTESTINAL TOXICITY</b>                                              | <b>Mild<br/>(Grade 1)</b>                                                                 | <b>Moderate<br/>(Grade 2)</b>                                                                          | <b>Severe<br/>(Grade 3)</b>                                                                                  |
| Nausea                                                                        | No interference with activity                                                             | Some interference with activity                                                                        | Prevents daily activities                                                                                    |
| Vomiting                                                                      | No interference with activity OR 1 - 2 episodes/24 hours                                  | Some interference with activity OR >2 episodes/24 hours                                                | Prevents daily activity OR requires IV hydration OR requires medical intervention                            |
| Diarrhea                                                                      | 2 - 3 loose or watery stools or <400 g/24 hours                                           | 4 - 5 loose or watery stools or 400 - 800 g/24 hours                                                   | 6 or more loose or watery stools or >800g/24 hours OR requires IV hydration OR requires medical intervention |

<sup>1</sup> Inclusion dependent upon protocol requirements.

| <b>LOCAL REACTIONS</b>                                                             | <b>Mild<br/>(Grade 1)</b>                       | <b>Moderate<br/>(Grade 2)</b>                                                           | <b>Severe<br/>(Grade 3)</b>                                                                    |
|------------------------------------------------------------------------------------|-------------------------------------------------|-----------------------------------------------------------------------------------------|------------------------------------------------------------------------------------------------|
| Pain                                                                               | Does not interfere with activity                | Repeated use of non-narcotic pain reliever >24 hours OR interferes with activity        | Any use of narcotic pain reliever OR prevents daily activity                                   |
| Tenderness                                                                         | Discomfort only to touch                        | Discomfort with movement                                                                | Significant discomfort at rest                                                                 |
| Erythema/Redness <sup>2</sup>                                                      | 2.5 - 5 cm                                      | 5.1 - 10 cm                                                                             | >10 cm                                                                                         |
| Induration/Swelling <sup>3</sup>                                                   | 2.5 - 5 cm and does not interfere with activity | 5.1 - 10 cm OR interferes with activity                                                 | >10 cm OR prevents daily activity                                                              |
| <b>SYSTEMIC REACTIONS</b>                                                          | <b>Mild<br/>(Grade 1)</b>                       | <b>Moderate<br/>(Grade 2)</b>                                                           | <b>Severe<br/>(Grade 3)</b>                                                                    |
| Allergic Reaction                                                                  | Pruritus without rash                           | Localized urticaria OR requires oral therapy                                            | Generalized urticaria; angioedema OR anaphylaxis OR requires epinephrine                       |
| Headache                                                                           | No interference with activity                   | Repeated use of non-narcotic pain reliever >24 hours OR some interference with activity | Significant; any use of narcotic pain reliever OR prevents daily activity OR requires triptans |
| Fatigue                                                                            | No interference with activity                   | Some interference with activity                                                         | Significant; prevents daily activity                                                           |
| Myalgia                                                                            | No interference with activity                   | Some interference with activity                                                         | Significant; prevents daily activity                                                           |
| <b>All Other conditions</b>                                                        | <b>Mild<br/>(Grade 1)</b>                       | <b>Moderate<br/>(Grade 2)</b>                                                           | <b>Severe<br/>(Grade 3)</b>                                                                    |
| Illness or clinical adverse event (as defined according to applicable regulations) | No interference with activity                   | Some interference with activity not requiring medical intervention                      | Prevents daily activity and requires medical intervention                                      |

<sup>2</sup> In addition to grading the measured local reaction at the greatest single diameter, the measurement should be recorded as a continuous variable.

<sup>3</sup> Induration/Swelling should be evaluated and graded using the functional scale as well as the actual measurement.

**Laboratory and Vital Signs Reference Ranges, Eligibility Ranges, and Toxicity Grading**

| <b>Blood, Serum, or Plasma Chemistries<sup>1</sup></b> | <b>Reference Range<sup>2</sup></b> | <b>Eligibility Range<sup>3</sup></b> | <b>LO/Hi/N<sup>4</sup></b> | <b>Mild (Grade 1)</b> | <b>Moderate (Grade 2)</b> | <b>Severe (Grade 3)</b> |
|--------------------------------------------------------|------------------------------------|--------------------------------------|----------------------------|-----------------------|---------------------------|-------------------------|
| Sodium (mEq/L)                                         | 135 - 145                          | 135 - 145                            | LO                         | 132 - <LLN            | 130 - 131                 | <130                    |
|                                                        |                                    |                                      | HI                         | >ULN - 148            | 149 - 150                 | >150                    |
| Potassium (mEq/L)                                      | 3.5 – 5.0                          | 3.5 – 5.0                            | HI                         | >ULN - 5.2            | 5.3 - 5.4                 | >5.4                    |
|                                                        |                                    |                                      | LO                         | >LLN - 3.1            | <3.1 - 3.0                | <3.0                    |
| Blood Urea Nitrogen (BUN, mg/dL)                       | 7 - 20                             | 7 - 20                               | HI                         | 21 - 26               | 27 - 31                   | >31                     |
| Creatinine (mg/dL)                                     | 0.5 - 1.2                          | 0.5 – 1.2                            | HI                         | >ULN - 1.7            | 1.8 - 2.0                 | >2.0                    |
| Glucose (mg/dL)                                        | <70                                | <70                                  | LO                         | 65 - 69               | 55 - 64                   | <55                     |
|                                                        | 70 - 99                            | 70 - 99                              | HI <sup>5</sup>            | >ULN - 120            | 121 - 130                 | >130                    |
|                                                        | 70 - 140                           | 70 - 140                             | HI <sup>6</sup>            | 141 - 159             | 160 - 200                 | >200                    |
| Total Protein (g/dL)                                   | 5.8 - 7.8                          | 5.8 - 7.8                            | LO                         | 5.2 - <LLN            | 4.8 - 5.1                 | <4.8                    |
| Bilirubin, serum total (mg/dL)                         | 0.4 - 1.5                          | 0.4 - 1.5                            | HI                         | 1.6 - 2.0             | 2.1 - 2.5                 | >2.5                    |
| ALT (U/L)                                              | Female: 14-54                      | Female: 14-54                        | HI                         | >ULN - 105            | 106 - 175                 | >175                    |
|                                                        | Male: 17-63                        | Male: 17-63                          |                            |                       |                           |                         |
| AST (U/L)                                              | 15 - 41                            | 15 - 41                              | HI                         | 42 - 105              | 106 - 175                 | >175                    |
| Alkaline phosphatase (U/L)                             | 24 - 110                           | 24 - 110                             | HI                         | 111 - 240             | 241 - 360                 | >360                    |

| <b>Hematology</b>           | <b>Reference Range<sup>7</sup></b> | <b>Eligibility Range<sup>8</sup></b> | <b>LO/Hi/N<sup>9</sup></b> | <b>Mild (Grade 1)</b> | <b>Moderate (Grade 2)</b> | <b>Severe (Grade 3)</b> |
|-----------------------------|------------------------------------|--------------------------------------|----------------------------|-----------------------|---------------------------|-------------------------|
| Hemoglobin (Females) (g/dL) | 12.0-15.5                          | 12.0-15.5                            | LO                         | 11.0 - 11.9           | 9.5 - 10.9                | <9.5                    |
| Hemoglobin (Males) (g/dL)   | 13.7-17.3                          | 13.7-17.3                            | LO                         | 12.0 – 13.6           | 10.0 - 11.9               | <10.0                   |

<sup>1</sup> Depending upon the lab used, references ranges, eligibility ranges and grading may be split out by sex and/or age.

<sup>2</sup> Reference range of site laboratory

<sup>3</sup> Laboratory values acceptable for eligibility for enrollment

<sup>4</sup> High, Low, Not Graded

<sup>5</sup> Fasting

<sup>6</sup> Non-fasting

<sup>7</sup> Reference range of site laboratory

<sup>8</sup> Laboratory values acceptable for eligibility for enrollment

<sup>9</sup> High, Low, Not Graded

| <b>Hematology</b>                                  | <b>Reference Range<sup>7</sup></b> | <b>Eligibility Range<sup>8</sup></b> | <b>LO/Hi/N<sup>9</sup></b> | <b>Mild (Grade 1)</b> | <b>Moderate (Grade 2)</b> | <b>Severe (Grade 3)</b> |
|----------------------------------------------------|------------------------------------|--------------------------------------|----------------------------|-----------------------|---------------------------|-------------------------|
| White Blood Cell Count (WBC, K/CUMM)               | 3.2-9.8                            | 3.2-9.8                              | HI                         | 9.9 – 14.99           | 15.00 - 20.00             | >20.00                  |
|                                                    |                                    |                                      | LO                         | 2.50 - 3.19           | 1.50 - 2.49               | <1.50                   |
| Lymphocytes (K/CUMM)                               | 0.6-4.2                            | 0.6-4.2                              | LO                         | 0.50 – 0.59           | 0.40 - 0.49               | <0.4                    |
| Neutrophils (K/CUMM)                               | 2.0-8.6                            | 2.0-8.6                              | LO                         | 1.50 – 1.99           | 1.00 - 1.49               | <1.00                   |
| Eosinophils (K/CUMM)                               | 0.0-0.7                            | 0.0-0.7                              | HI                         | >ULN - 0.74           | 0.75 - 1.50               | >1.50                   |
| Platelets (K/CUMM)                                 | 150-450                            | 150-450                              | LO                         | 120 - 149             | 100 - 119                 | <100                    |
| <b>Coagulation</b>                                 |                                    |                                      |                            |                       |                           |                         |
| Prothrombin time (PT, seconds)                     | 9.5-13.1                           | 9.5-13.1                             | HI                         | >ULN - 14.4           | 14.5 - 15.7               | >15.7                   |
| Partial thromboplastin time (PTT or aPTT, seconds) | 26.8-37.1                          | 26.8-37.1                            | HI                         | >ULN - 42.1           | 42.2 - 50.0               | >50.0                   |
| <b>Urine*</b>                                      |                                    |                                      |                            |                       |                           |                         |
| Protein (dipstick)                                 | 0                                  | 0                                    | HI                         | 1+                    | 2+                        | >2+                     |
| Glucose (dipstick)                                 | 0                                  | 0                                    | HI                         | 1+                    | 2+                        | >2+                     |

| <b>Vital Signs</b>                            | <b>Mild (Grade 1)<sup>10</sup></b>          | <b>Moderate (Grade 2)</b>                   | <b>Severe (Grade 3)</b>              |
|-----------------------------------------------|---------------------------------------------|---------------------------------------------|--------------------------------------|
| Fever (°F)                                    | 100.4 - 101.1                               | 101.2 - 102.0                               | ≥102.1                               |
| Tachycardia - beats per minute <sup>11</sup>  | 101 - 115                                   | 116 - 130                                   | >130 or ventricular dysrhythmias     |
| Bradycardia - beats per minute <sup>12</sup>  | 50 – 54 or 45 – 49<br>if baseline 50-59 bpm | 45 – 49 or 40 - 44<br>if baseline 50-59 bpm | < 45 or <40<br>if baseline 50-59 bpm |
| Hypertension (systolic) - mm Hg <sup>13</sup> | 141 - 150                                   | 151 - 160                                   | >160                                 |
| Hypertension (diastolic) - mm Hg              | 91 - 95                                     | 96 - 100                                    | >100                                 |

<sup>10</sup> If initial bound of Grade 1 has gap from reference range or eligibility range, calculations based on NEJM reference ranges

<sup>11</sup> Expanded heart rate limits can be considered with normal ECGs.

<sup>12</sup> Expanded heart rate limits can be considered with normal ECGs.

<sup>13</sup> Assuming subject is awake, resting, and supine; for AE, 3 measurements on the same arm with concordant results.

| <b>Vital Signs</b>             | <b>Mild<br/>(Grade 1)<sup>10</sup></b> | <b>Moderate<br/>(Grade 2)</b> | <b>Severe<br/>(Grade 3)</b> |
|--------------------------------|----------------------------------------|-------------------------------|-----------------------------|
| Hypotension (systolic) - mm Hg | 85 - 89                                | 80 - 84                       | <80                         |
| Tachypnea - breaths per minute | 23 - 25                                | 26 - 30                       | >30                         |
